# Supplementary material
Source: publisher site journal article supplement (https://www.dovepress.com/get_supplementary_file.php?f=335571.docx)
Supplement: Supplementary file 1 [file get_supplementary_file.php]

Supplementary Materials


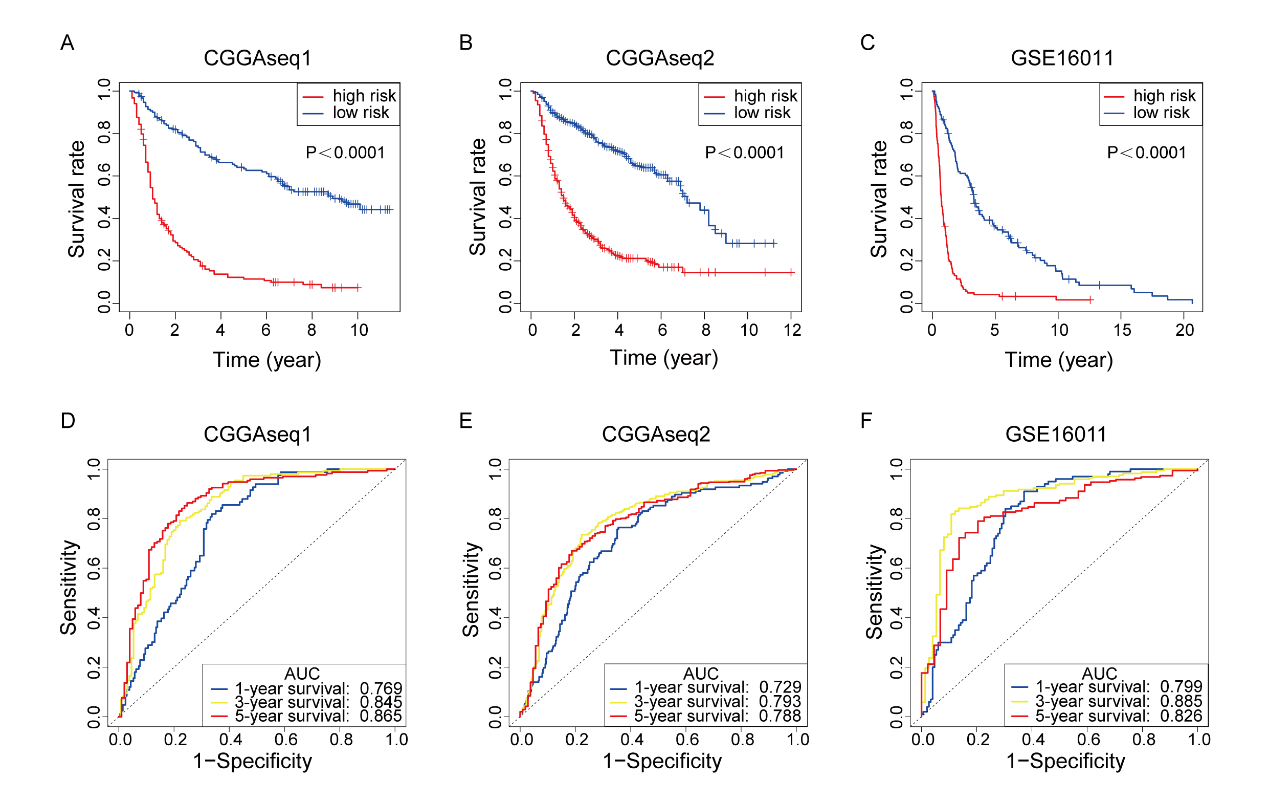


Supplementary Figure 1. External validation of the ARG-related risk signature in CGGAseq1, CGGAseq2, and GSE16011 datasets.

A-C. The prognostic value of the risk signature in three external validation cohorts showed by Kaplan-Meier survival curves between high- and low-risk groups. D-F. ROC curves for predicting 1-, 3-, 5-year survival of glioma patients in external validation cohorts.


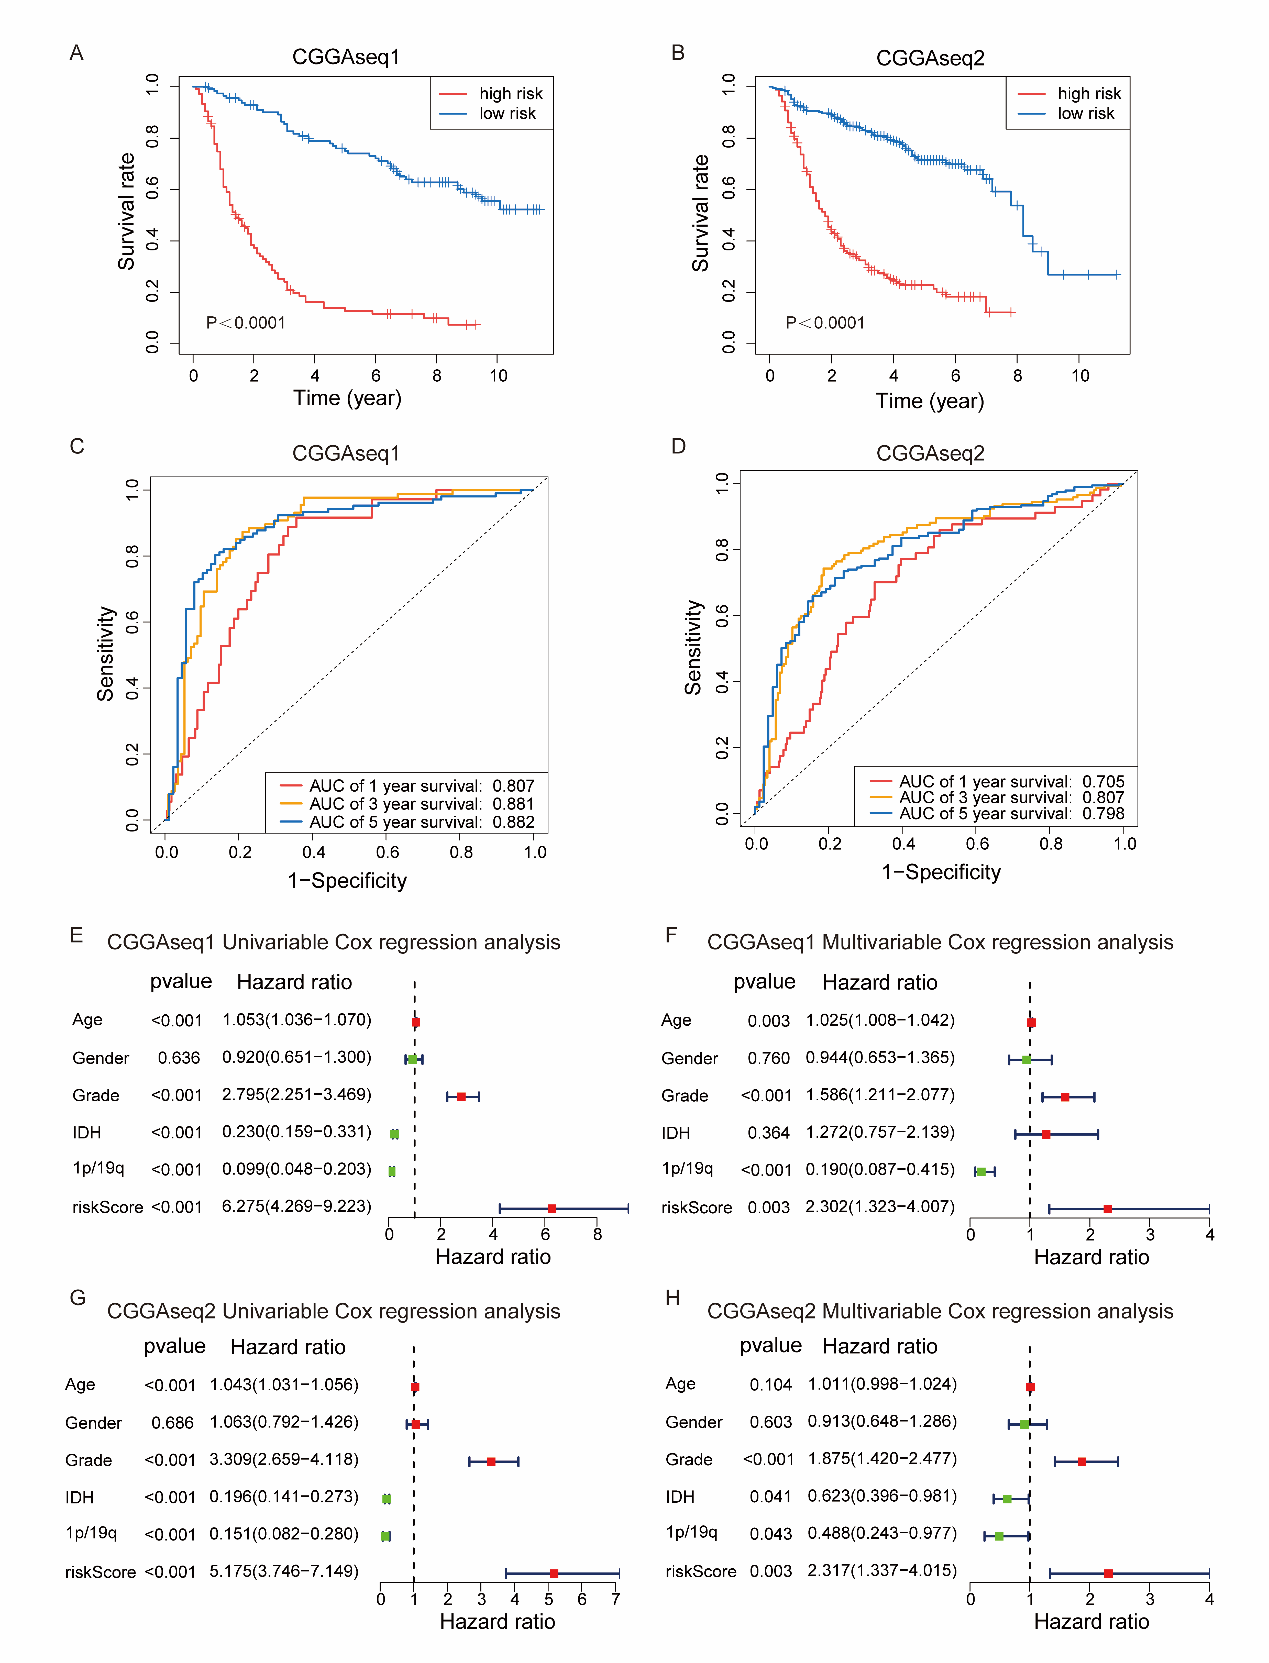


Supplementary Figure 2. The prognostic value of the ARG-related risk signature in primary glioma patients in the CGGAseq1 and CGGAseq2 validation cohorts.

A-B. Kaplan-Meier survival curves between high- and low-risk groups.

C-D. ROC curves for predicting 1-, 3-, 5-year survival of primary glioma patients.

E-F. Univariate and multivariate Cox regression analyses were used to further validate the independent prognostic ability of the ARG-related risk signature.


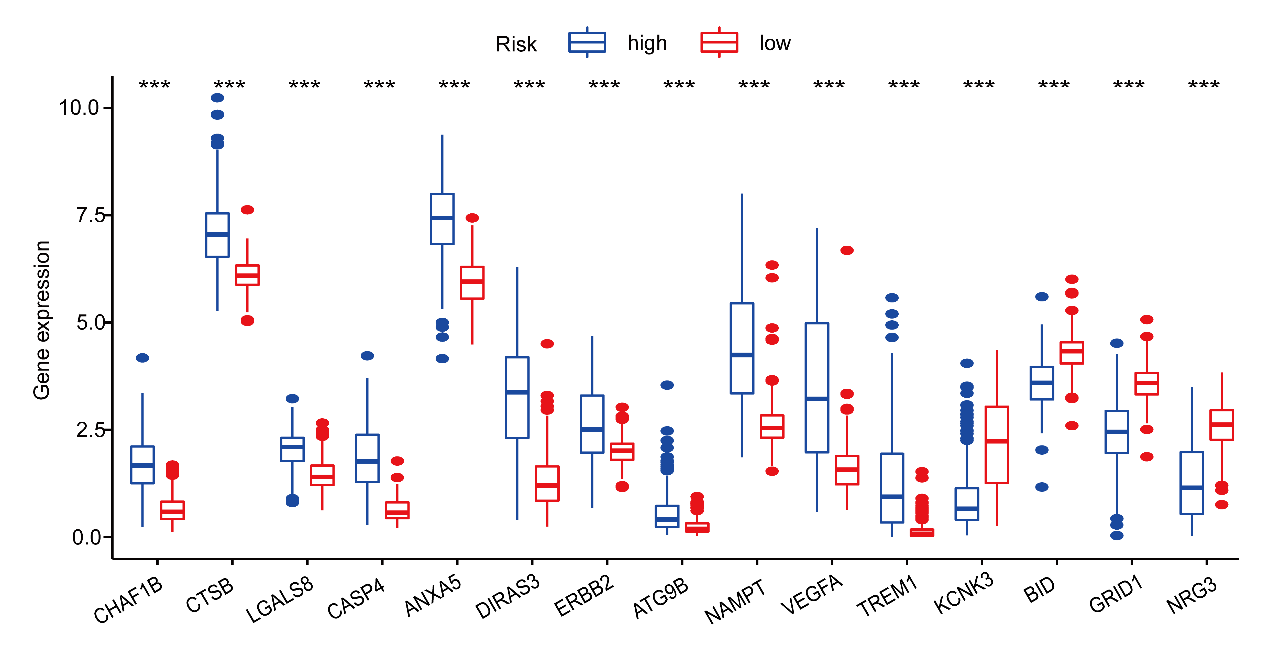


Supplementary Figure 3. The mRNA expression level of identified ARGs in the high- and low-risk groups.


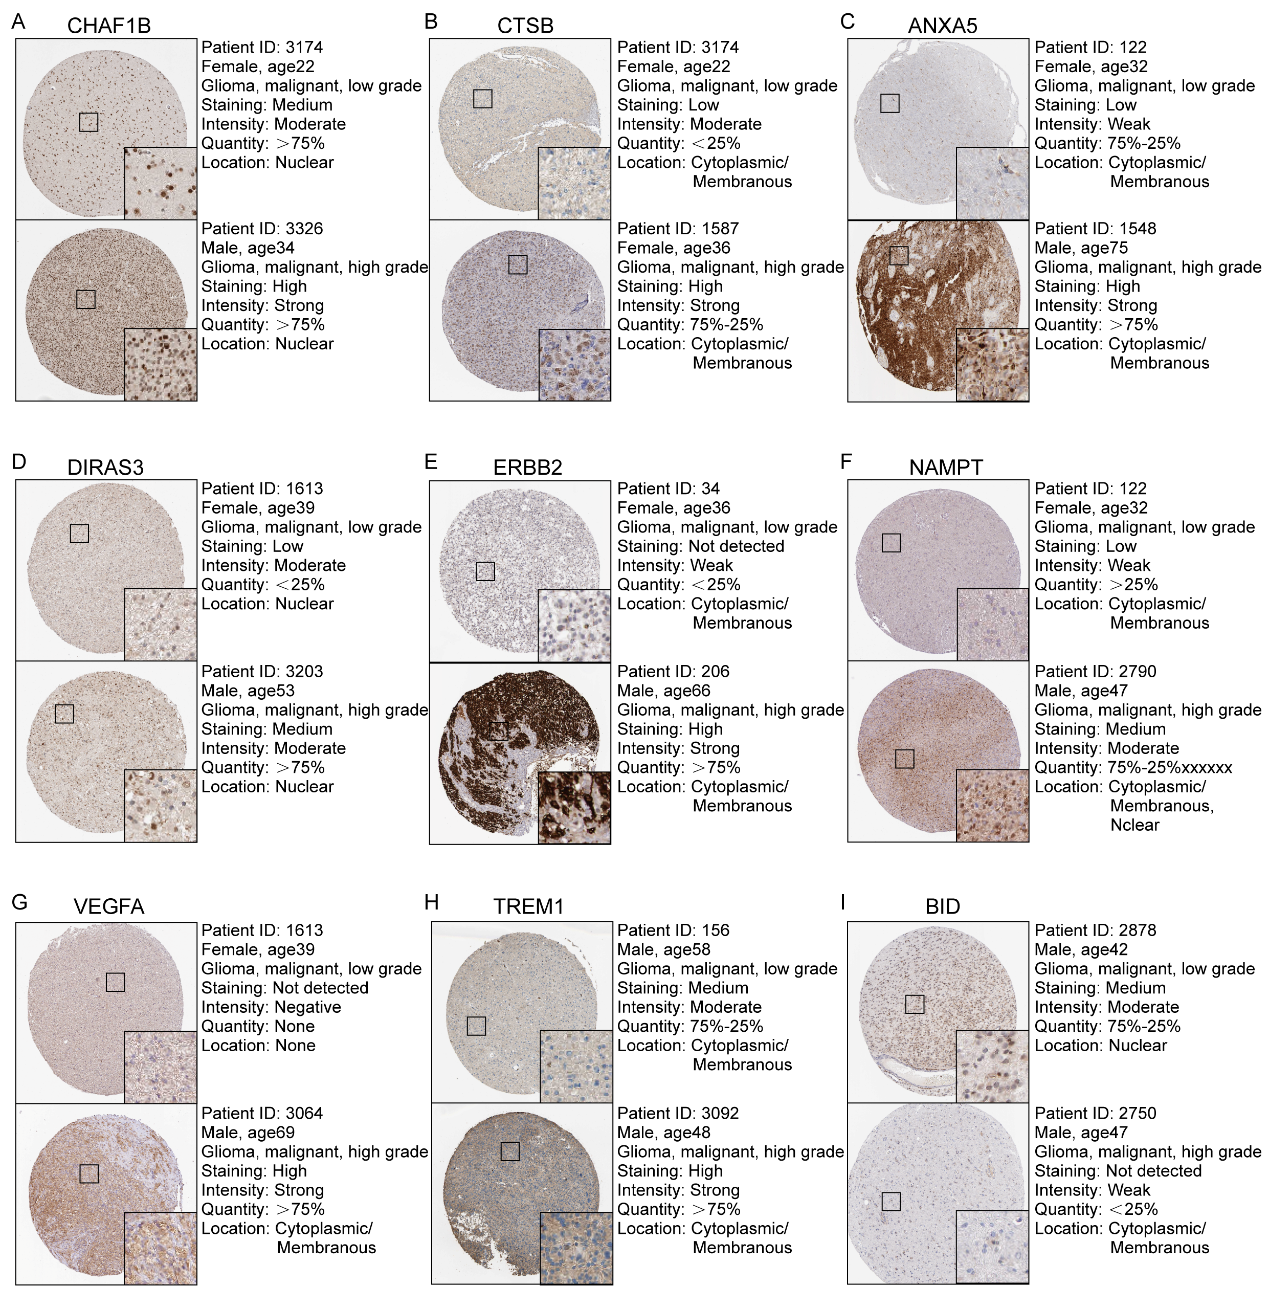


Supplementary Figure 4. IHC staining images of representative ARGs in low- and high-grade glioma samples from HPA database.

A-H. The protein expression levels of the ARGs (including CHAF1B, CTSB, ANXA5, DIRAS3, ERBB2, NAMPT, VEGFA and TREM1) in high-grade glioma patients were significantly higher than those in patients with low-grade glioma. I. The protein expression level of BID in high-grade glioma patients were significantly lower than patients with low-grade glioma.


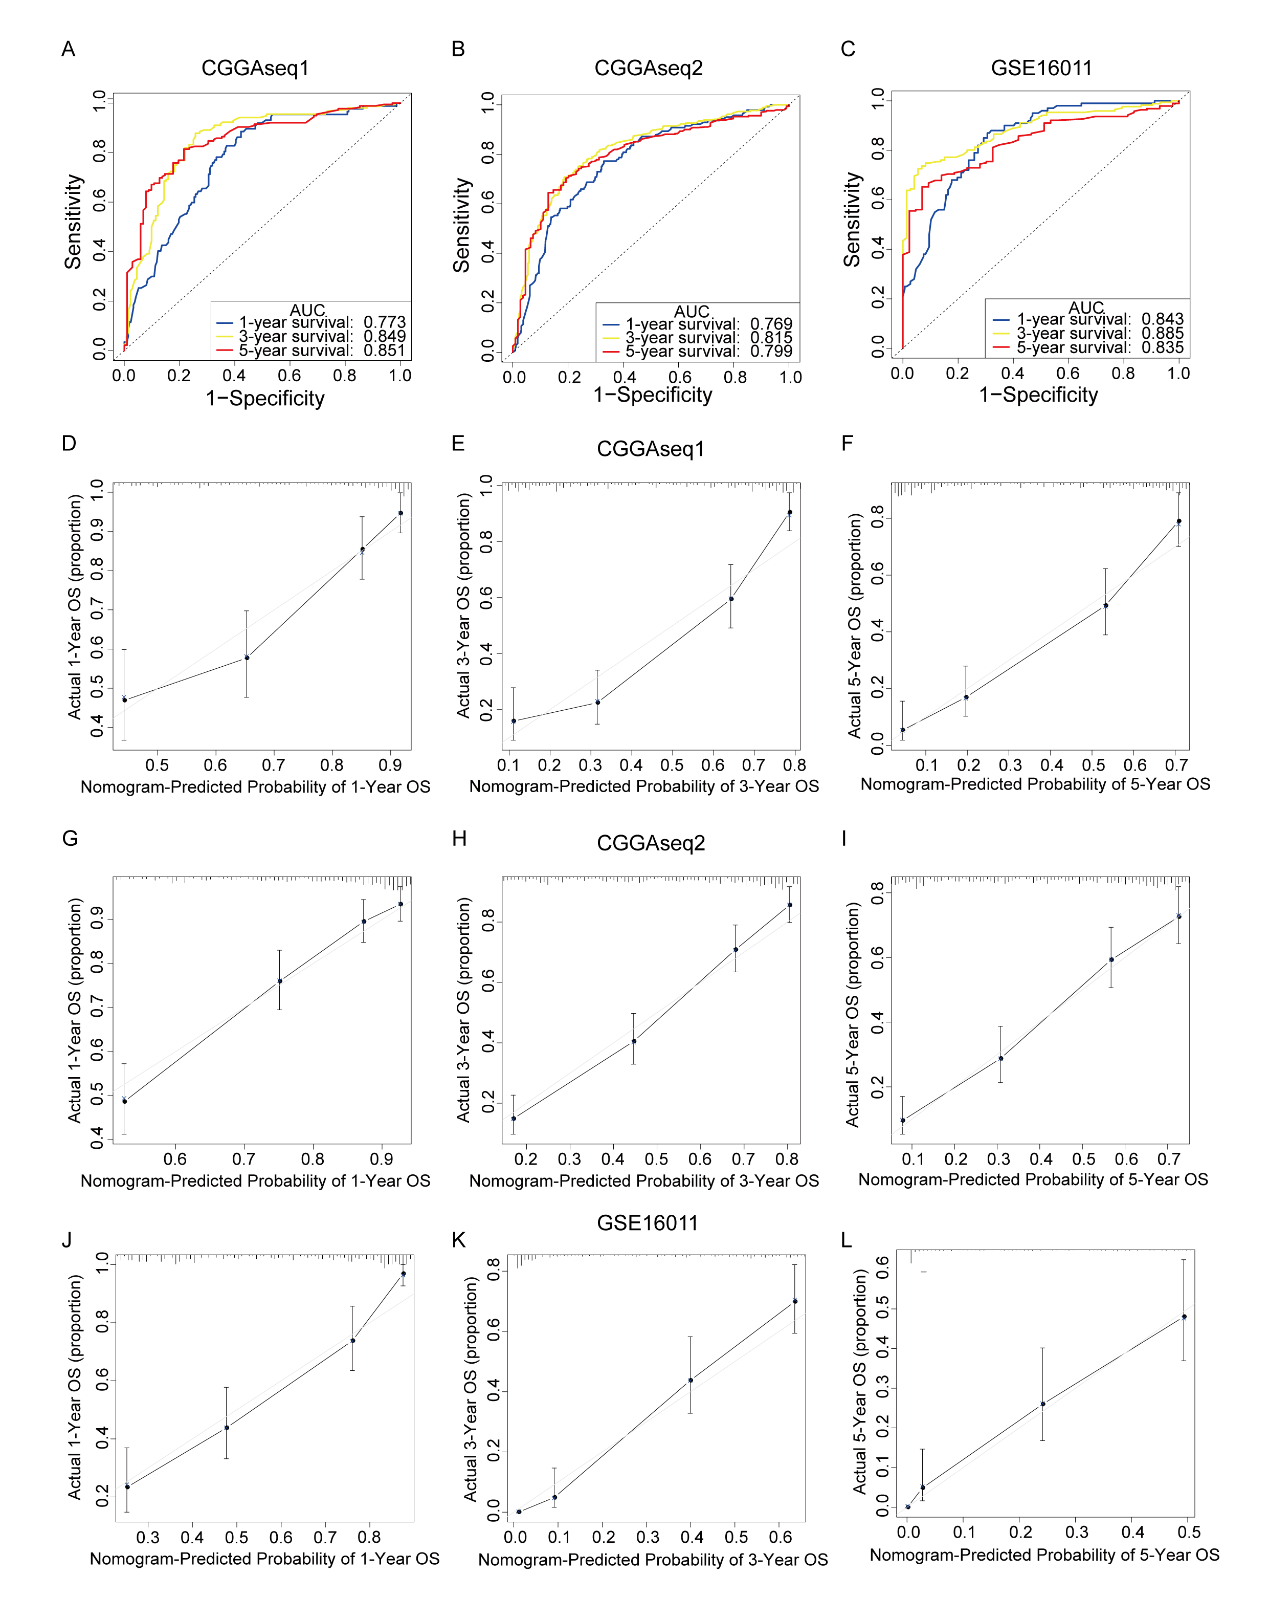


Supplementary Figure 5. External validation of the nomogram model in CGGAseq1, CGGAseq2, and GSE16011 datasets.

A-C. Excellent predictive ability for the 1-, 3-, and 5-year survival rates showed by the AUC values of ROC curves in external validation datasets.

D-L. The calibration plots for the three validation cohorts showed excellent agreement between the nomogram prediction and actual survival proportion.
